# Supplementary material for: Incorporation of 1-ethyl-3-methyl-imidazolium acetate into UiO-66 as an efficient sorbent for carbon dioxide capture
Source: Royal Society of Chemistry journal article supplement (doi:10.1039/d2nj05826j), 2022-12-20
Supplement: d2nj05826j1.pdf [file d2nj05826j1.pdf]

## Supplementary information

### **Incorporation of 1-ethyl-3-methyl-imidazolium acetate into UiO-66 as efficient sorbents for carbon dioxide capture**

Shiyu Nie<sup>1</sup>, Fengfeng Chen\*<sup>1,2</sup>, Tianbo Shen<sup>1</sup>, Tingting Wang<sup>1</sup>, Ningyu Di<sup>2</sup>, Junkuo Gao\*<sup>1,2</sup>

<sup>1</sup>Lab of Functional Porous Materials, School of Materials Science and Engineering, Zhejiang Sci-Tech

University, Hangzhou 310018, China

<sup>2</sup>Zhejiang Bofay Electric Co., LTD, Haining 314400, China

E-mail address: cff19931015@zstu.edu.cn (F. Chen), jkgao@zstu.edu.cn (J. Gao).

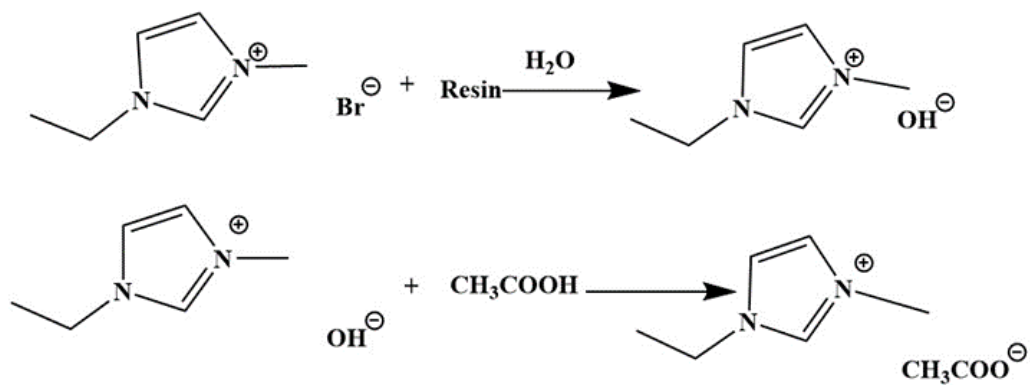

Figure S1. Schematic diagram of the synthesis of [Emim][Ac]

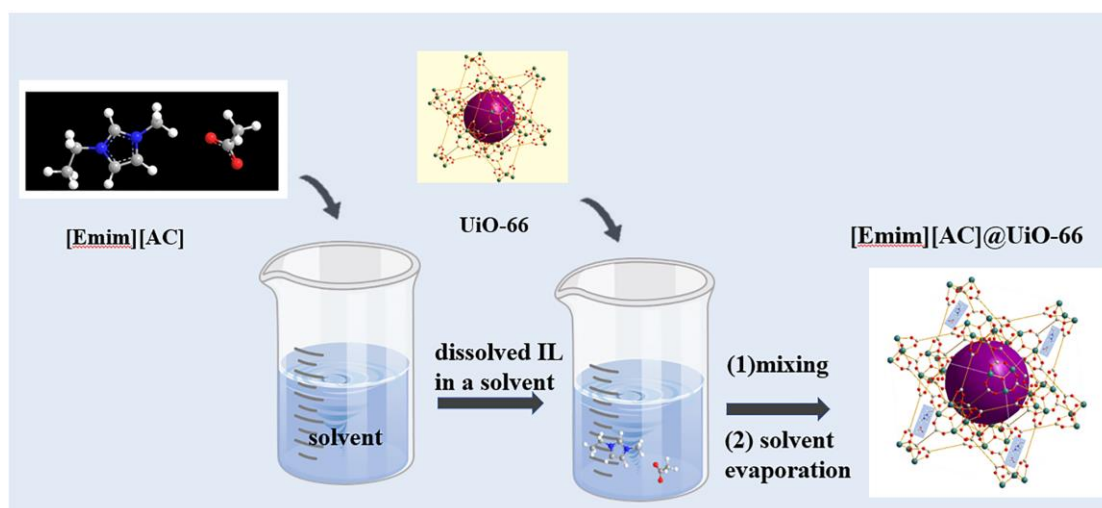

Figure S2. Synthetic method of the [Emim][Ac]@UiO-66.

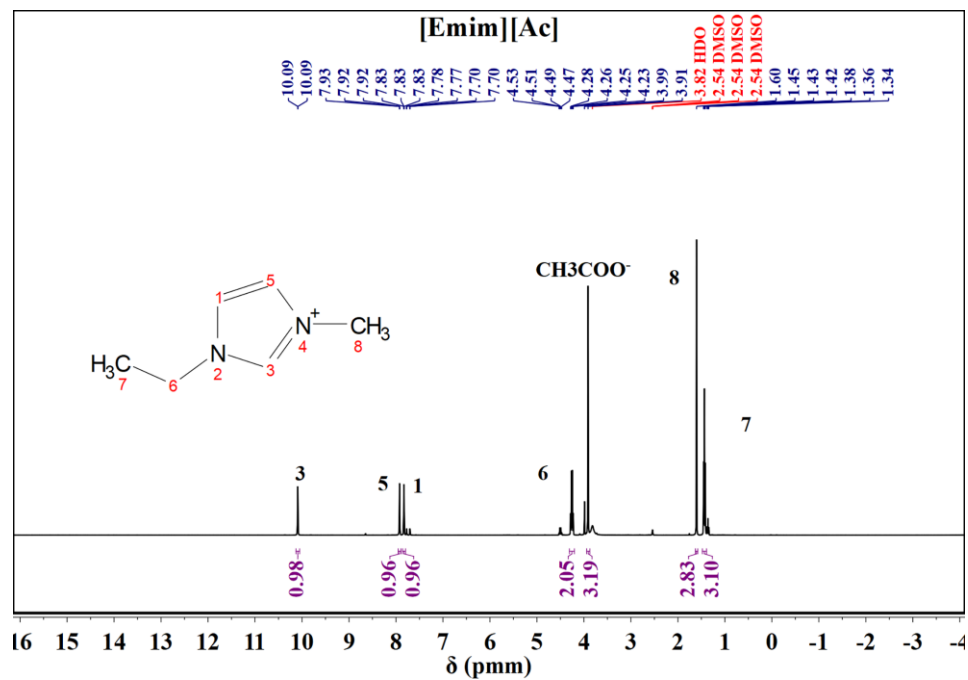

Figure S3. <sup>1</sup>H NMR spectrum of [Emim][Ac] in DMSO-d<sub>6</sub> (r.t). <sup>1</sup>H NMR (400 MHz, DMSO, 298.2K, TMS), δ (ppm): 1.40 (3H, dt), 1.61 (3H, s), 3.96 (3H, d), 4.26 (2H, q), 7.90 (1H, d), 8.01 (1H, d), 10.32 (1H, s).

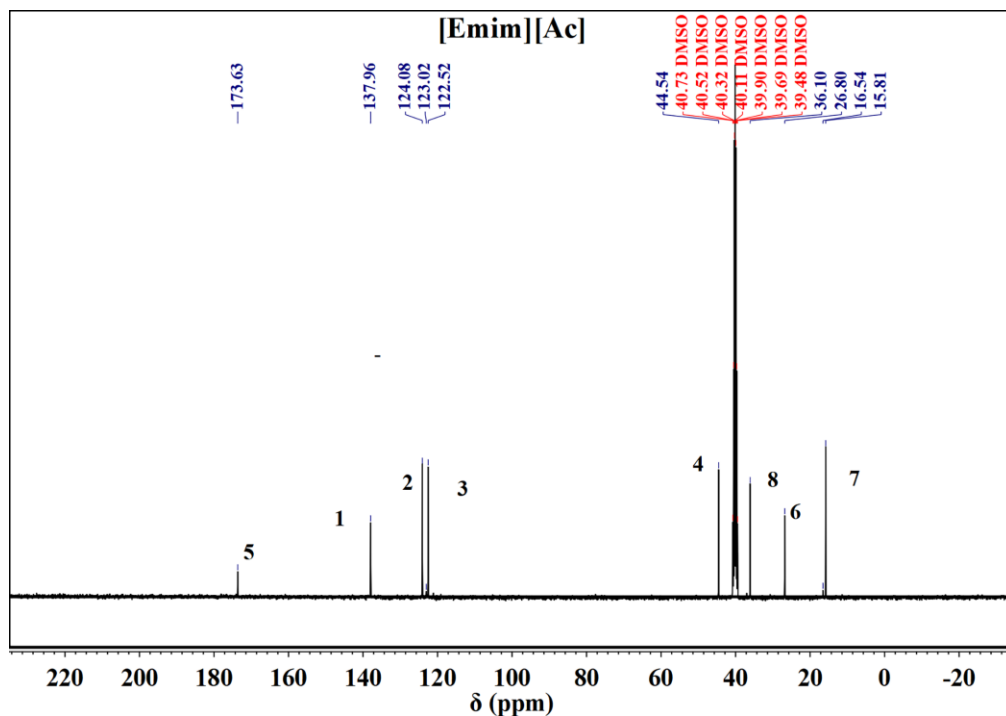

Figure S4. <sup>13</sup>C NMR spectrum of [Emim][Ac] in DMSO-d<sub>6</sub> (r.t). <sup>13</sup>C NMR (101 MHz, DMSO, 298.2K, TMS), δ (ppm): 15.6, 26.6, 35.8, 44.3, 122.4, 123.9, 138.3, 173.7.

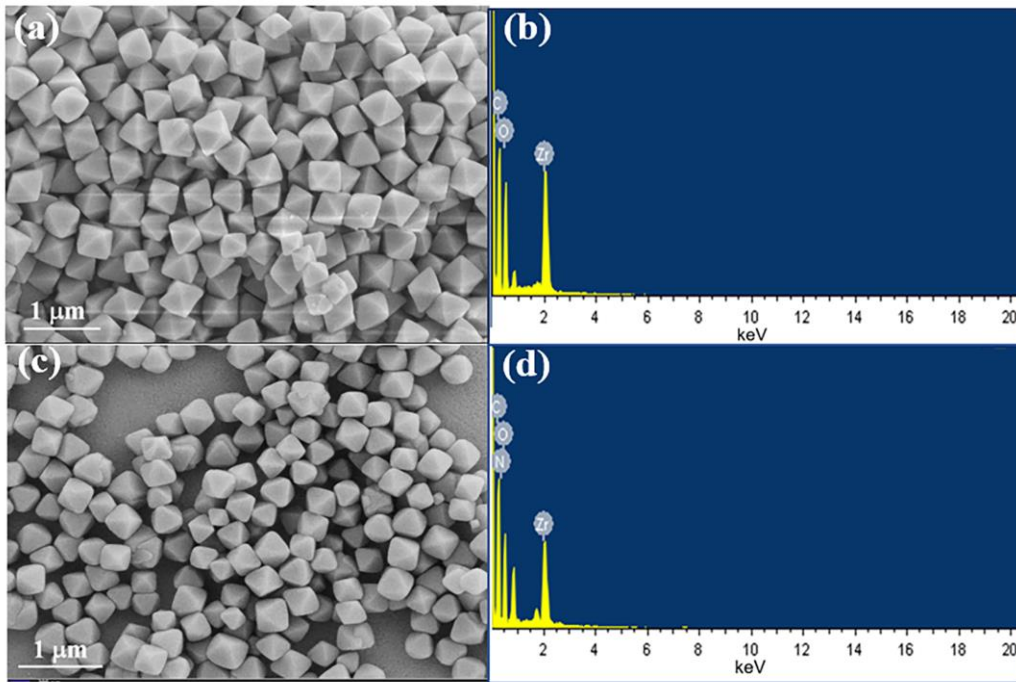

Figure S5. (a) SEM image and (b) EDX spectra of pristine UiO-66, (c) SEM image and (d) EDX spectra of [Emim][Ac]@UiO-66-7.5%.

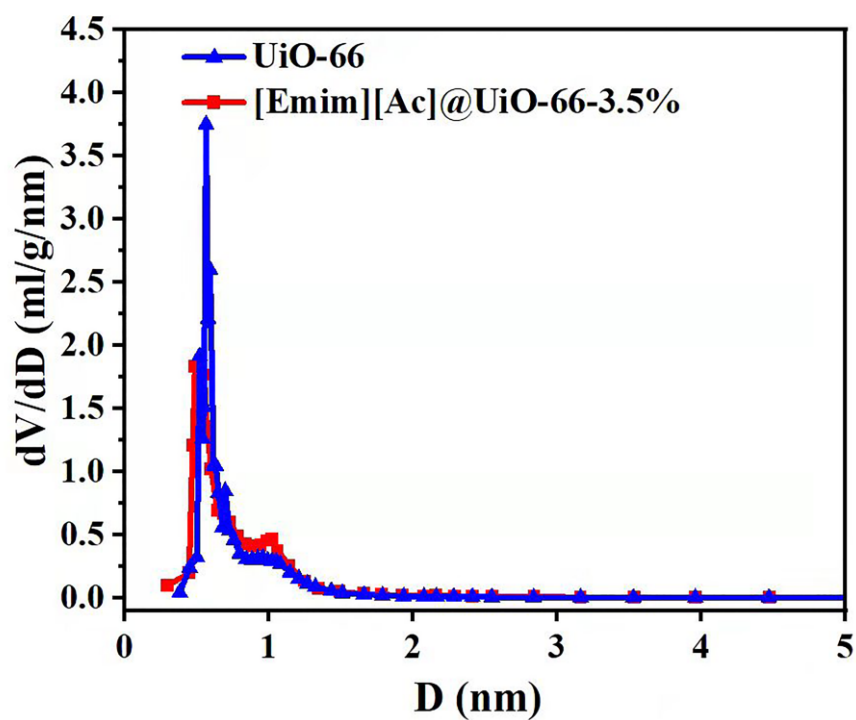

Figure S6. Pore size distribution of UiO-66 and [Emim][Ac]@UiO-66-3.5%.

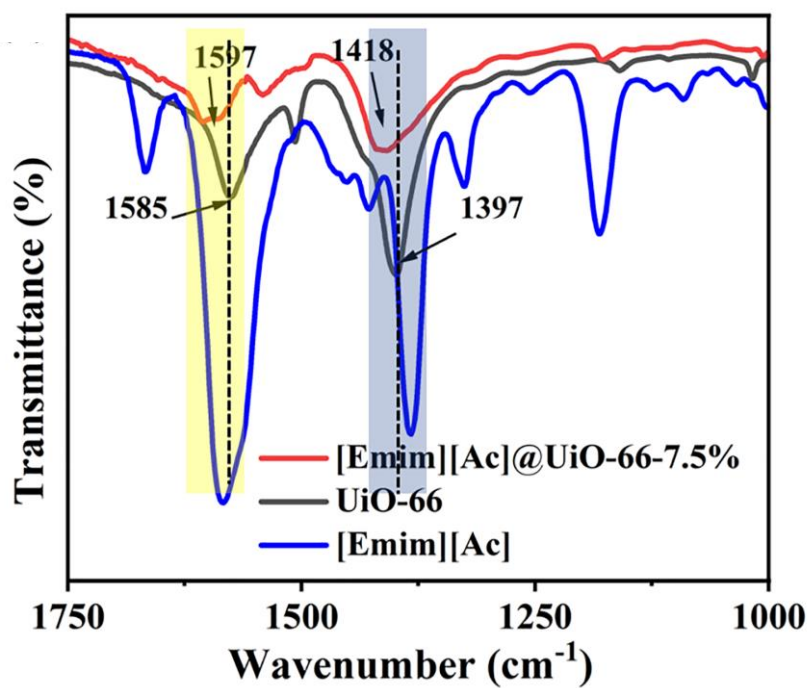

Figure S7. FTIR spectra of UiO-66, [Emim][Ac], and [Emim][Ac]@UiO-66-7.5% on 1000-1700  $\text{cm}^{-1}$ .

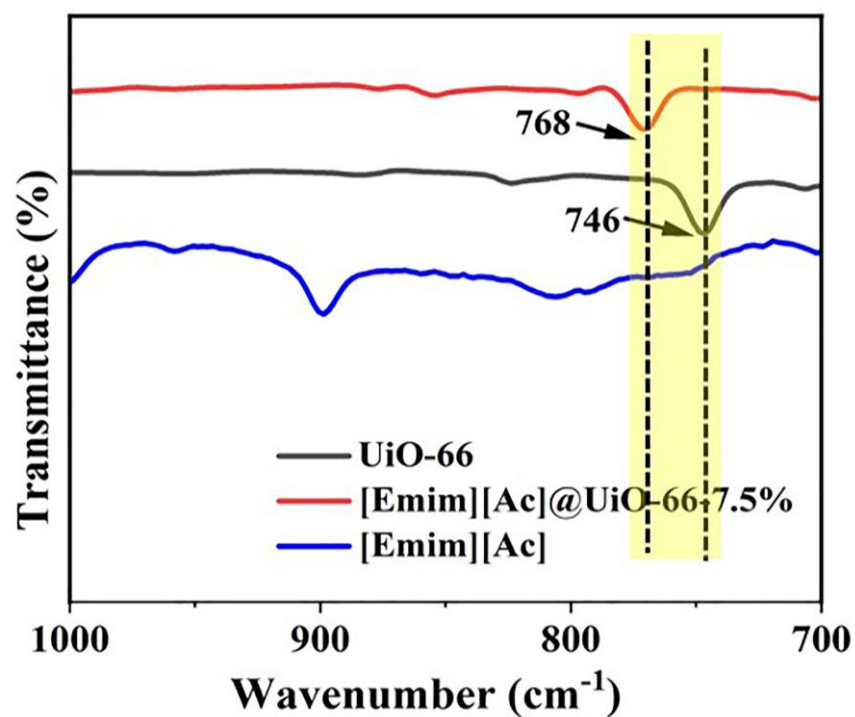

Figure S8. FTIR spectra of UiO-66, [Emim][Ac], and [Emim][Ac]@UiO-66-7.5% on 700-1000 cm<sup>-1</sup>.

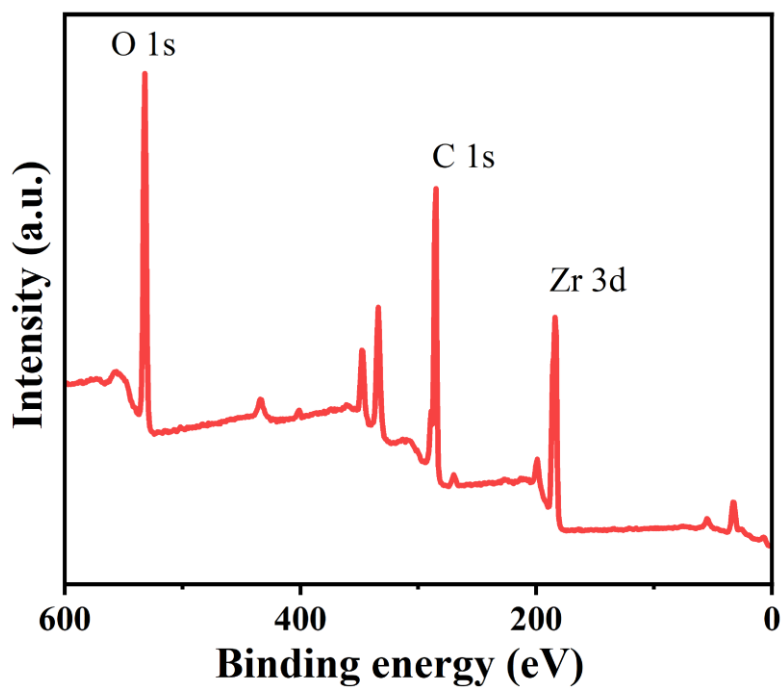

Figure S9. XPS spectrum of UiO-66.

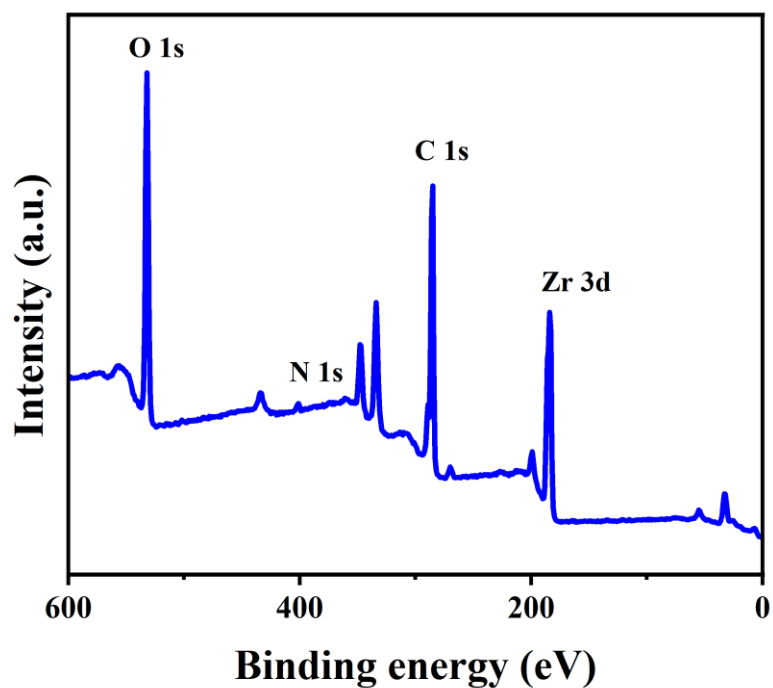

Figure S10. XPS spectrum of [Emim][Ac]@UiO-66-7.5%.

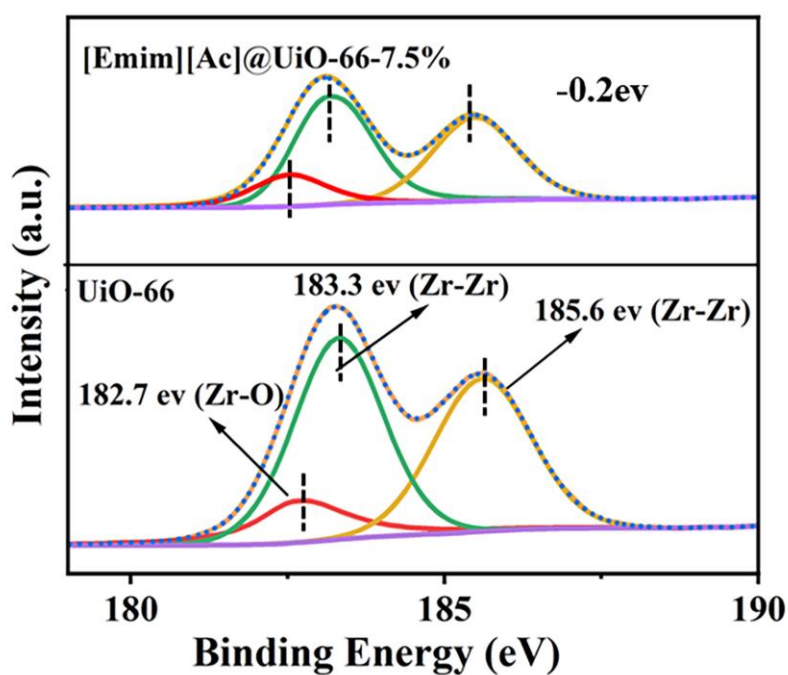

Figure S11. The Zr 3d region of the XPS spectra of UiO-66 and [Emim][Ac]@UiO-66-7.5%.

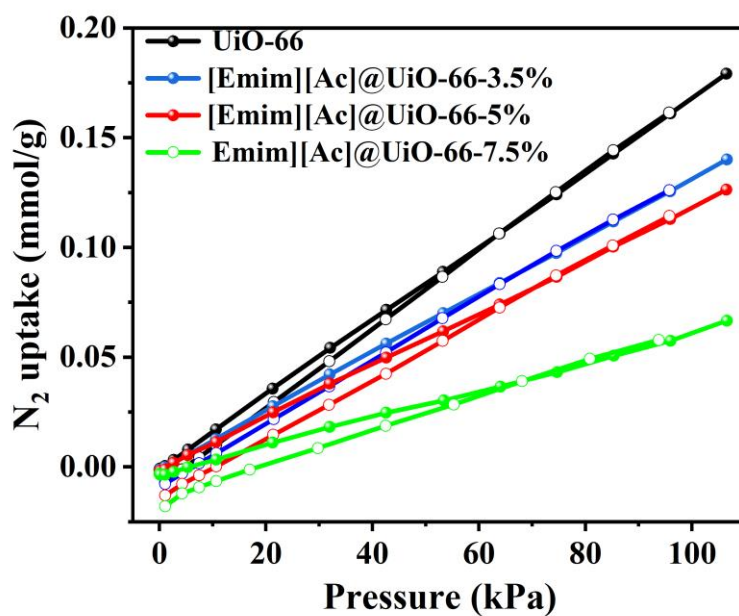

Figure S12. N<sub>2</sub> adsorption isotherms of [Emim][Ac]@UiO-66 composites at 298K and 1.0 bar.

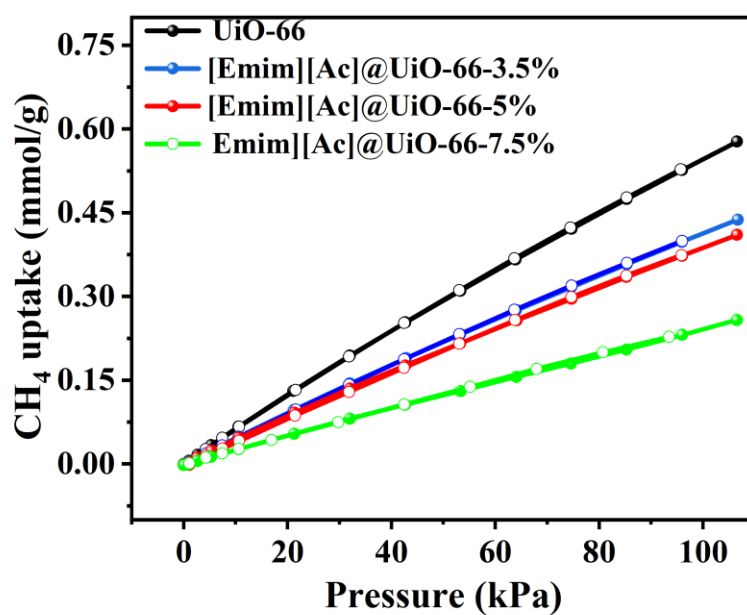

Figure S13. CH<sub>4</sub> adsorption isotherms of [Emim][Ac]@UiO-66 composites at 298 K and 1.0 bar.



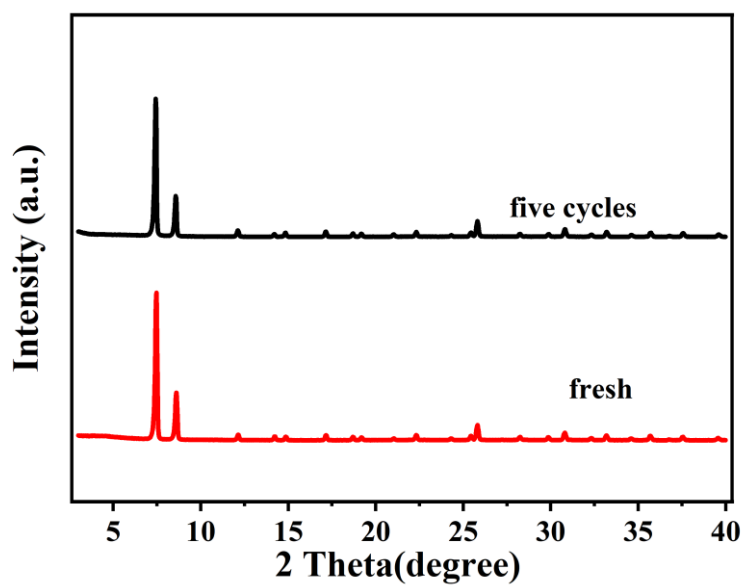

Figure S14. PXR D patterns of fresh [Emim][Ac]@UiO-66-3.5% and resued [Emim][Ac]@UiO-66-3.5% after five cycles.

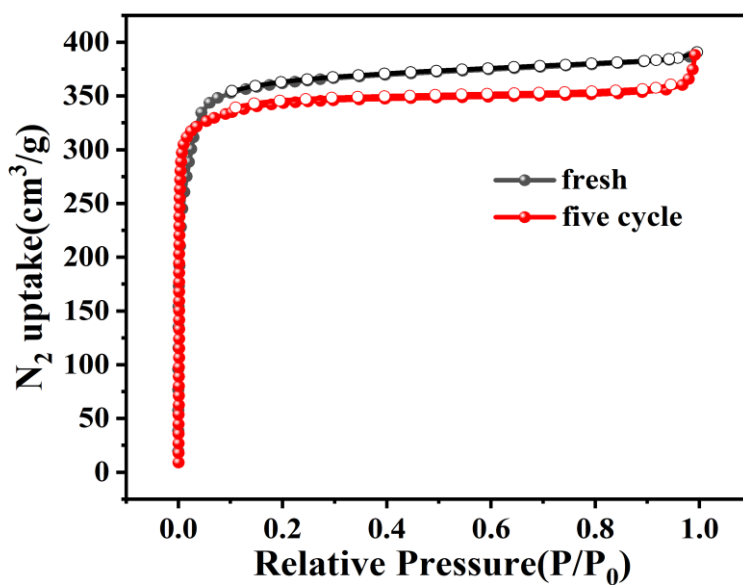

Figure S15. N<sub>2</sub> adsorption-desorption isotherms of fresh [Emim][Ac]@UiO-66-3.5% and resued [Emim][Ac]@UiO-66-3.5% after five cycles.

Table S1. Textural properties of [Emim][Ac]@UiO-66composites.

| Sample type            | BET surface area (m <sup>2</sup> /g) | Langmuir surface area (m <sup>2</sup> /g) | Total pore volume (cm <sup>3</sup> /g) | Average pore width (nm) |
|------------------------|--------------------------------------|-------------------------------------------|----------------------------------------|-------------------------|
| UiO-66                 | 1170.2                               | 1686.4                                    | 0.5817                                 | 0.7602                  |
| [Emim][Ac]@UiO-66-3.5% | 1117.3                               | 1612.9                                    | 0.5511                                 | 0.7506                  |
| [Emim][Ac]@UiO-66-5%   | 987.5                                | 1440.8                                    | 0.4894                                 | 0.7970                  |
| [Emim][Ac]@UiO-66-7.5% | 874.3                                | 1277.3                                    | 0.4417                                 | 0.7160                  |

Table S2. Comparison of the CO<sub>2</sub> adsorption capacity and CO<sub>2</sub>/N<sub>2</sub>, CO<sub>2</sub>/N<sub>2</sub> selectivity of different materials from different references.

| Samples                 | T<br>(k) | CO <sub>2</sub><br>(mmol/g) | CO <sub>2</sub> /N <sub>2</sub><br>selectivity | CO <sub>2</sub> /CH <sub>4</sub><br>selectivity | Ref.      |
|-------------------------|----------|-----------------------------|------------------------------------------------|-------------------------------------------------|-----------|
| UiO-66                  | 298      | 2.1                         | 18                                             | 6                                               | This work |
| [Emim][Ac]@UiO-66-3.5%  | 298      | 2.5                         | 72                                             | 11.4                                            | This work |
| ZIF-8                   | 298      | 0.71                        | 7                                              | 4                                               | 1         |
| IL-ZIF-IL               | 298      | 1.53                        | 5572                                           | 1190                                            | 2         |
| [HEMIM][DCA]@ZIF-8      | 298      | 0.49                        | -                                              | 117                                             | 3         |
| MIL-53(Al)              | 294      | 2.23                        | 4.5                                            | 3                                               | 4         |
| ZIF-68                  | 298      | 1.74                        | 19                                             | 5                                               | 5         |
| NUT-1                   | 298      | 1.36                        | 29000                                          | 400                                             | 6         |
| NUT-2                   | 298      | 0.99                        | 8000                                           | 360                                             | 6         |
| NUT-3                   | 298      | 0.64                        | 1600                                           | 90                                              | 6         |
| NH <sub>2</sub> -UiO-66 | 298      | 5.70                        | 31                                             | -                                               | 7         |

## References

1. J. McEwen, J. Hayman, A.O. Yazaydin, *ChemPhys.*, 2013, 412, 72-76.
2. G. P. Han, N. Yu, D. H. Liu, G.G. Yu, X. C. Chen and C. L. Zhong, *AIChE J.*, 2021, 67, e17112.
3. M. Zeeshan, V. Nozari, M.B. Yagci, T. Isik, U. Unal, V. Ortala, S. Keskin and A. Uzun, *J. Am. Chem. Soc.*, 2018, 140, 10113-10116.
4. P. Mishra, H. P. Uppara, B. Mandal and S. Gumma, *Ind. Eng. Chem. Res.*, 2014, 53, 19747-19753.
5. R. Banerjee, H. Furukawa, D. Britt, C. Knobler, M. O’Keeffe and O. M. Yaghi, *J. Am. Chem. Soc.*, 2009, 131, 3875-3877.
6. L. B. Sun, Y. H. Kang, Y. Q. Shi, Y. Jiang and X. Q. Liu, *ACS Sustain. Chem. Eng.*, 2015, 3, 3077-3085.
7. H. Molavi, A. Eskandari, A. Shojaei and S. A. Mousavi, *Microporous Mesoporous Mater.*, 2018, 257, 193-201.
